# Supplementary material for: Assessment of knowledge and skills in information literacy instruction for rehabilitation sciences students: a scoping review
Source: PubMed Central journal article supplement (PMC5764589; doi:10.5195/jmla.2018.227), 2018-01-02
Supplement: jmla-106-15-S001.pdf [file jmla-106-15-S001.pdf]

## Assessment of knowledge and skills in information literacy instruction for rehabilitation sciences students: a scoping review

Jill T. Boruff, AHIP; Pamela Harrison

### APPENDIX

#### MEDLINE search strategy

- 1 Occupational Therapy/
- 2 occupational therapy.ti,ab.
- 3 Physical Therapists/ or Physical Therapy Specialty/
- 4 physical therapy.ti,ab.
- 5 physiotherapy.ti,ab.
- 6 Speech-Language Pathology/
- 7 (speech language pathology or speech therapy).ti,ab.
- #8 Education, Nursing, Baccalaureate/ or Education, Nursing, Graduate/ or Education, Nursing/
- 9 Allied Health Occupations/
- 10 allied health.ti,ab.
- #11 nursing.ti.
- 12 1 or 2 or 3 or 4 or 5 or 6 or 7 or 8 or 9 or 10 or 11
- 13 (librar\* adj3 instruction).ti,ab.
- 14 Librarians/ or librarian\*.ti,ab.
- 15 Computer User Training/ or Computer Literacy/ or Information Literacy/ or information literacy.ti,ab.
- 16 evidence based practice.ti,ab. or Evidence-Based Practice/ or Evidence-Based Nursing/
- 17 (fresno test or berlin questionnaire).ti,ab.
- 18 (database search\* or pubmed search\* or medline search\* or literature search\*).ti,ab.
- 19 question formulation.ti,ab.
- 20 ((information or literature) adj retrieval).ti,ab.
- 21 ((Searching or library or information) adj skills).ti,ab.
- 22 online searching.ti,ab.
- 23 bibliographic instruction.ti,ab.
- 24 information professional\*.ti,ab.
- 25 or/13-24
- 26 (Curriculum or curricula or Education or academic or university or college or master\* or undergraduate\* or student\* or graduate or doctoral).ti,ab.
- 27 12 and 25 and 26

# Lines removed in search update.
